# Supplementary material for: Influence and stability of the surface density of MoOx on TiO2 in deoxydehydration: structure–activity correlations
Source: Royal Society of Chemistry journal article supplement (doi:10.1039/d2cy01854c), 2023-01-01
Supplement: d2cy01854c2.pdf [file d2cy01854c2.pdf]

**Influence and stability of the surface density of MoO<sub>x</sub> on TiO<sub>2</sub> in deoxydehydration:  
Structure-activity correlations**

Joby Sebastian,<sup>a</sup> Chalachew Mebrahtu,<sup>a</sup> Regina Palkovits<sup>a,b,\*</sup>

<sup>a</sup>Institut für Technische und Makromolekulare Chemie, RWTH Aachen University, Worringerweg 2, 52074 Aachen, Germany.

<sup>b</sup>Max-Planck-Institut for Chemical Energy Conversion, Stiftstr. 34-36, 45470 Mülheim an der Ruhr, Germany.

\*Corresponding author E-mail: [palkovits@itmc.rwth-aachen.de](mailto:palkovits@itmc.rwth-aachen.de)

---

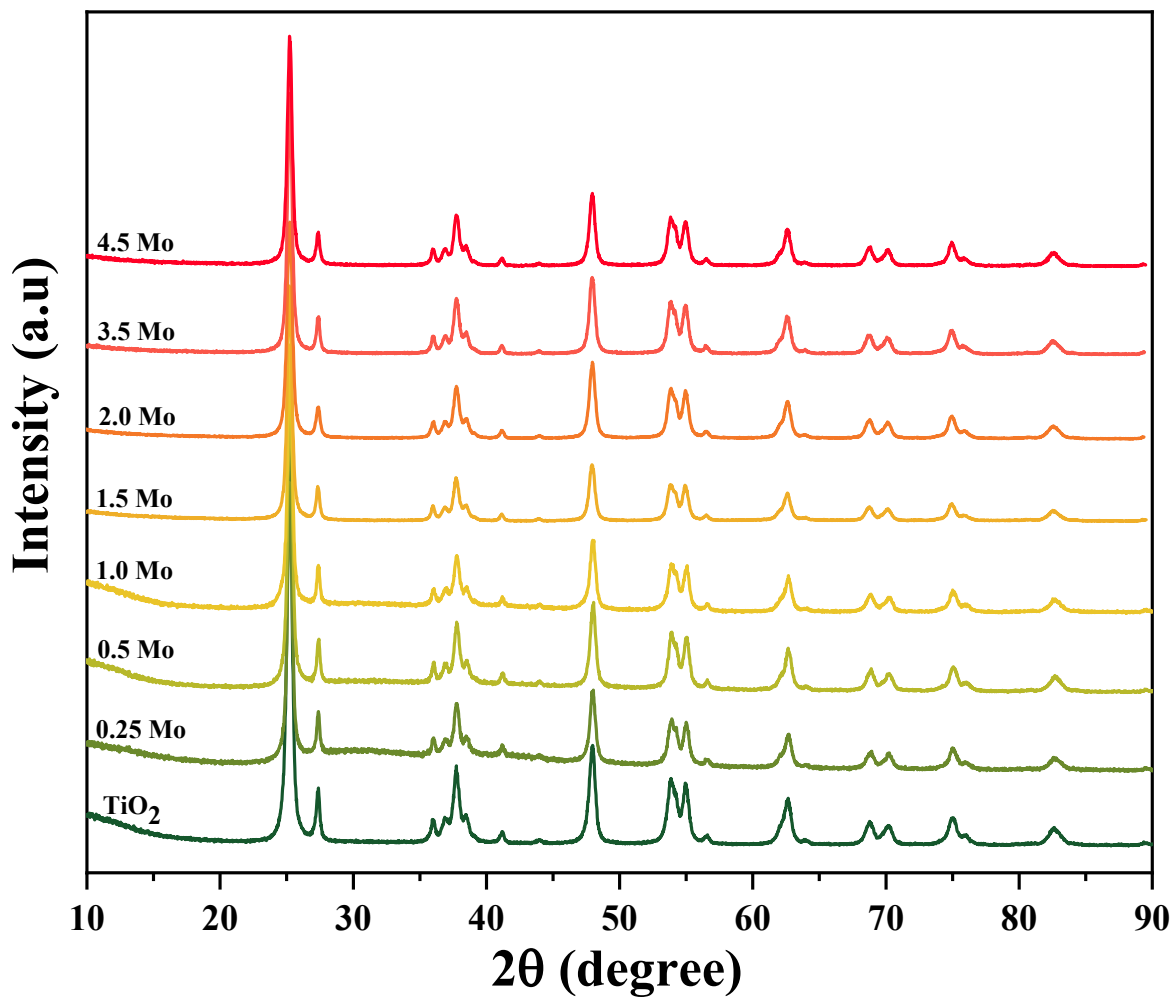

**Fig. S1** XRD patterns of catalysts containing different surface densities of MoO<sub>x</sub>.

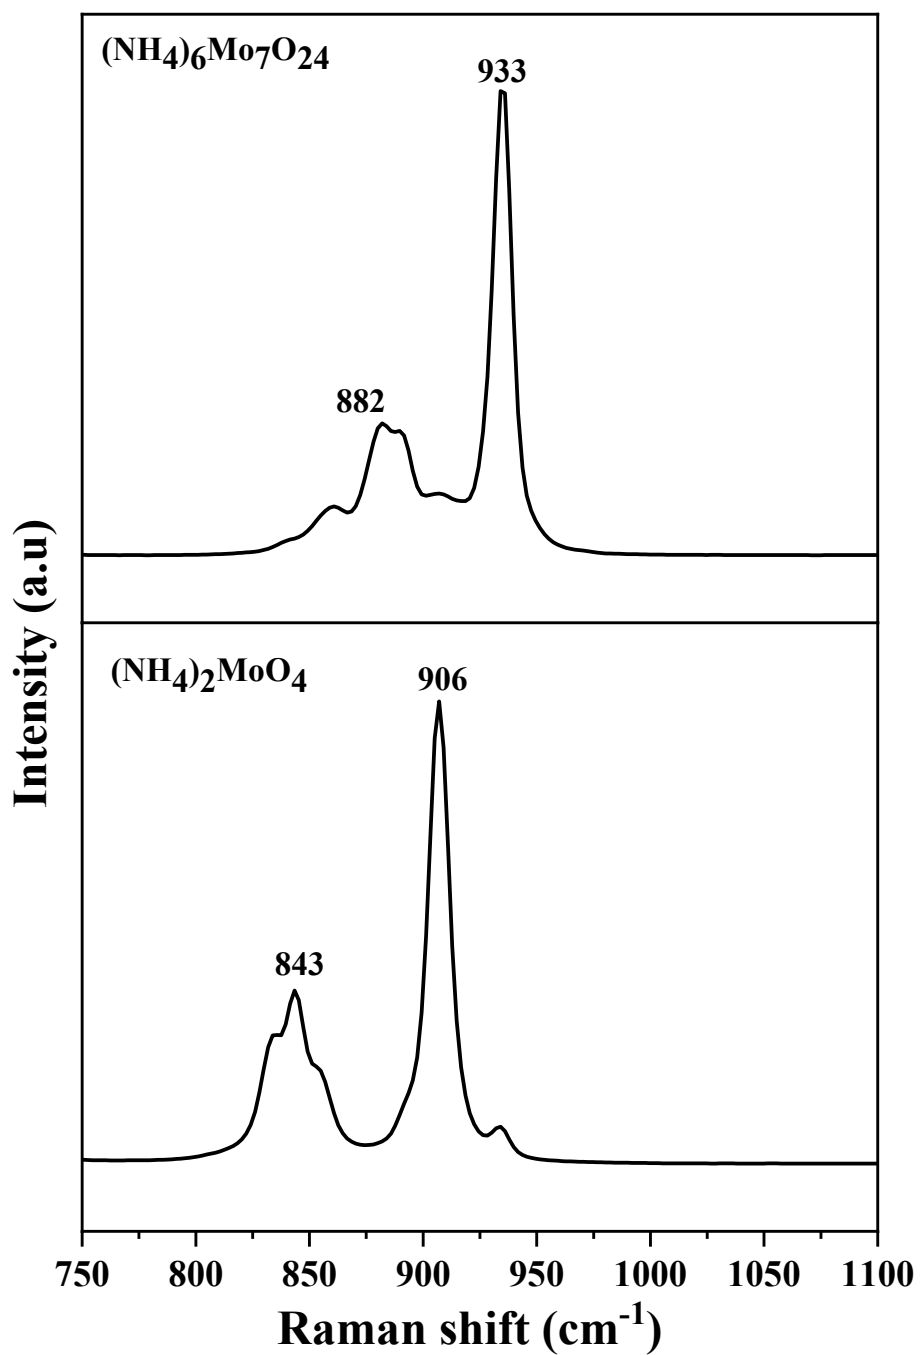

**Fig. S2** Raman spectra of monomeric precursor (NH<sub>4</sub>)<sub>2</sub>MoO<sub>4</sub> and polymeric (NH<sub>4</sub>)<sub>6</sub>Mo<sub>7</sub>O<sub>24</sub> showing precursor Mo=O stretching peaks at 906 and 933 cm<sup>-1</sup> respectively.

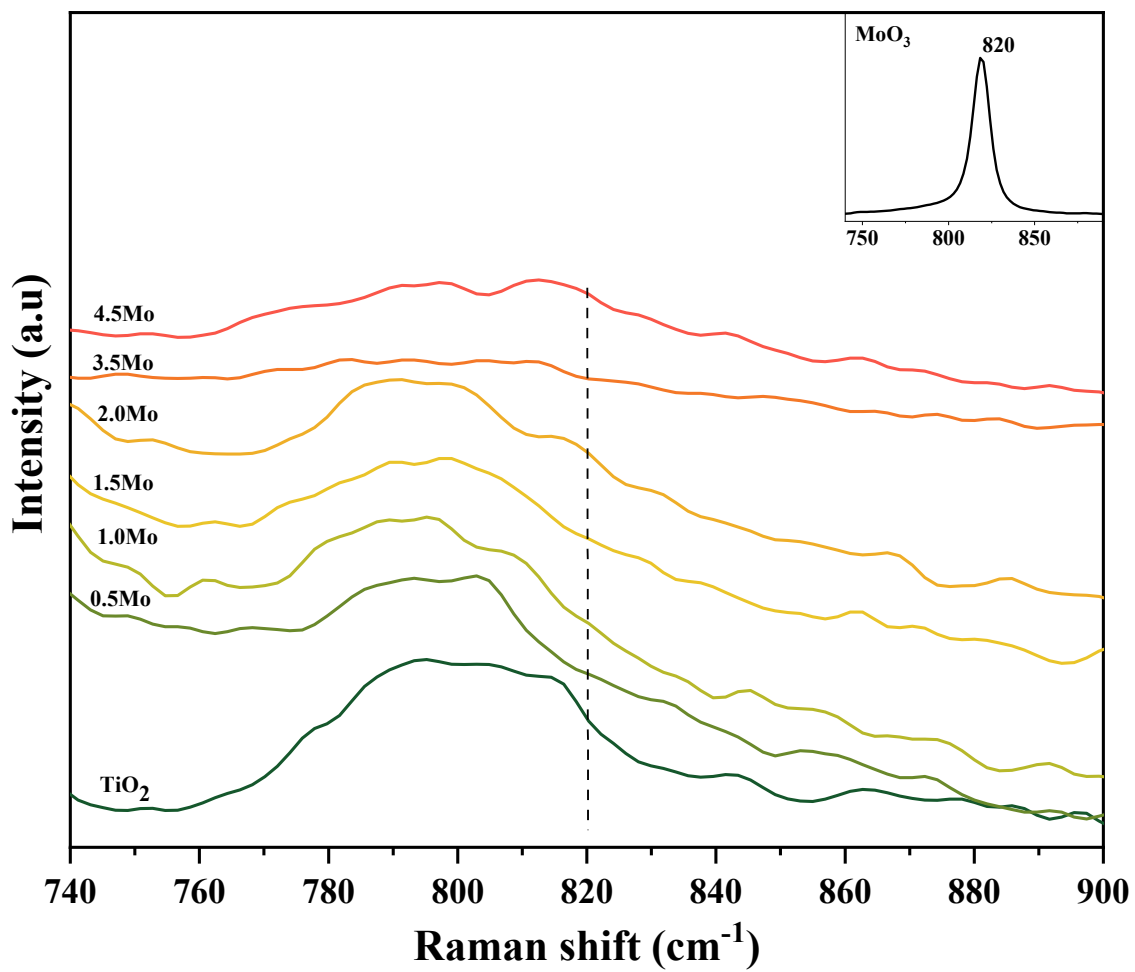

Fig. S3 Raman spectra of the catalysts in the 820 cm<sup>-1</sup> range.

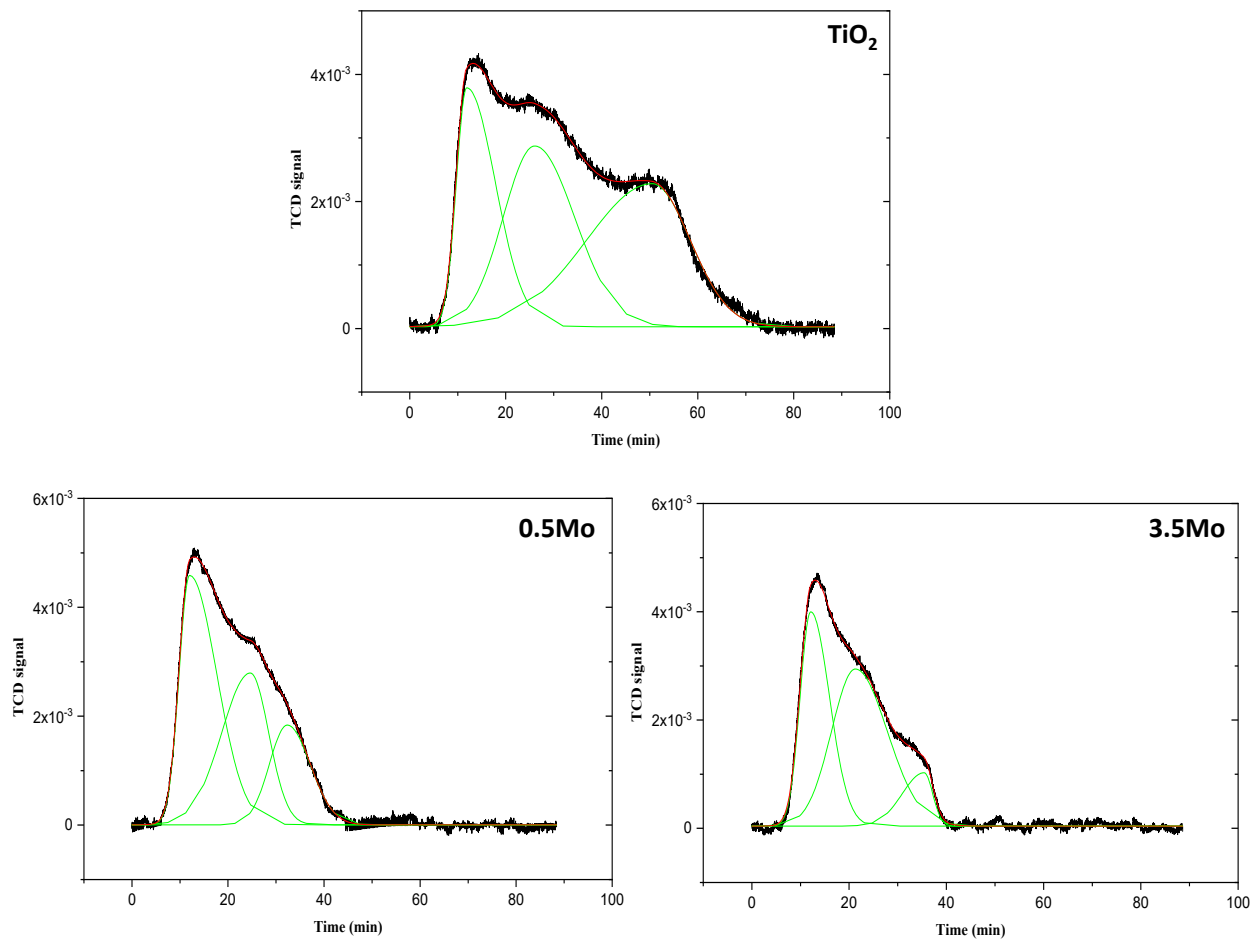

**Fig. S4** NH<sub>3</sub>-TPD deconvolution graphs of TiO<sub>2</sub>, 0.5Mo, and 3.5Mo catalysts.

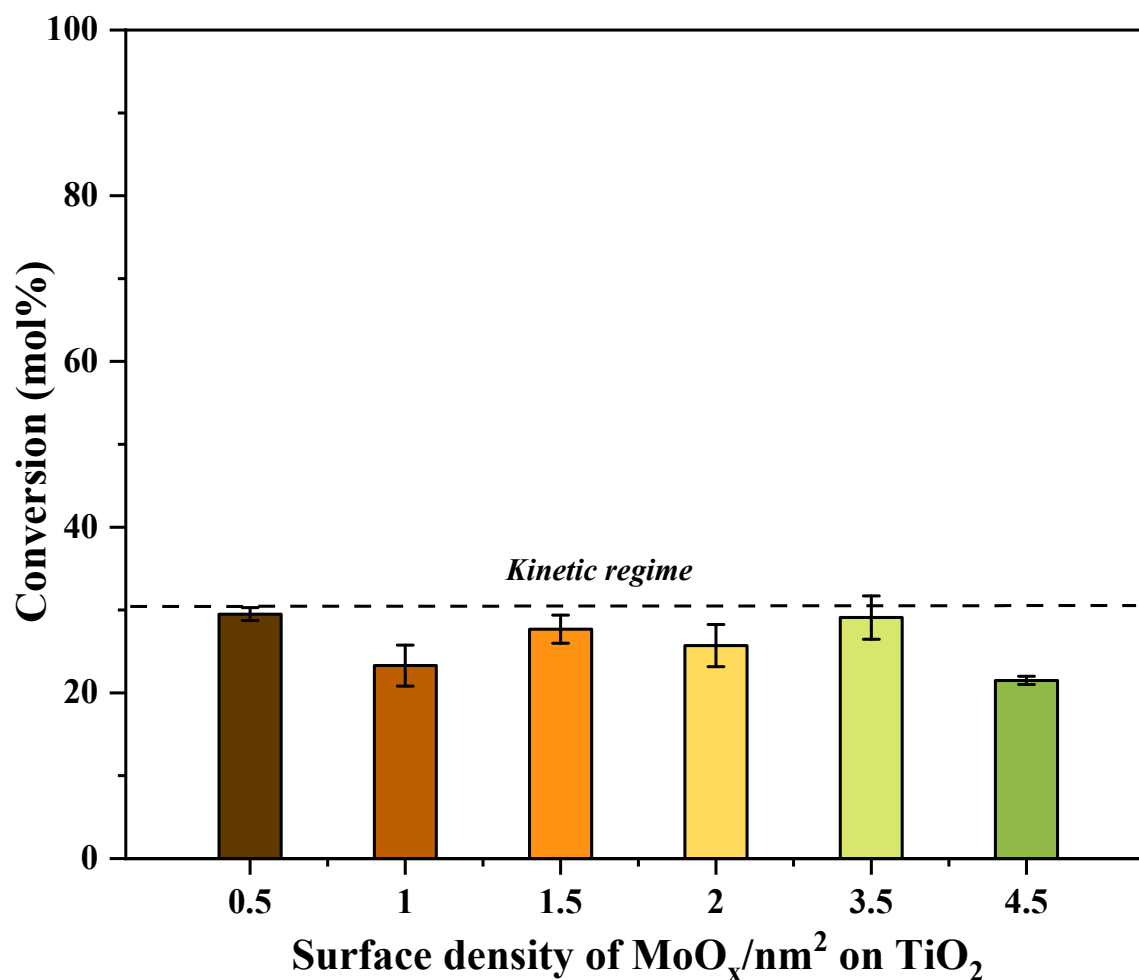

**Fig S5.** Conversion and yield of MoO<sub>x</sub>/TiO<sub>2</sub> in the kinetic regime with different surface densities of Mo. *Reaction conditions:* 1,4-AHE = 0.6 mmol, 3-Octanol = 6 mmol, Mo = 0.4-0.8 mol% w.r.t 1,4-AHE, T = 200°C, t = 18 h.

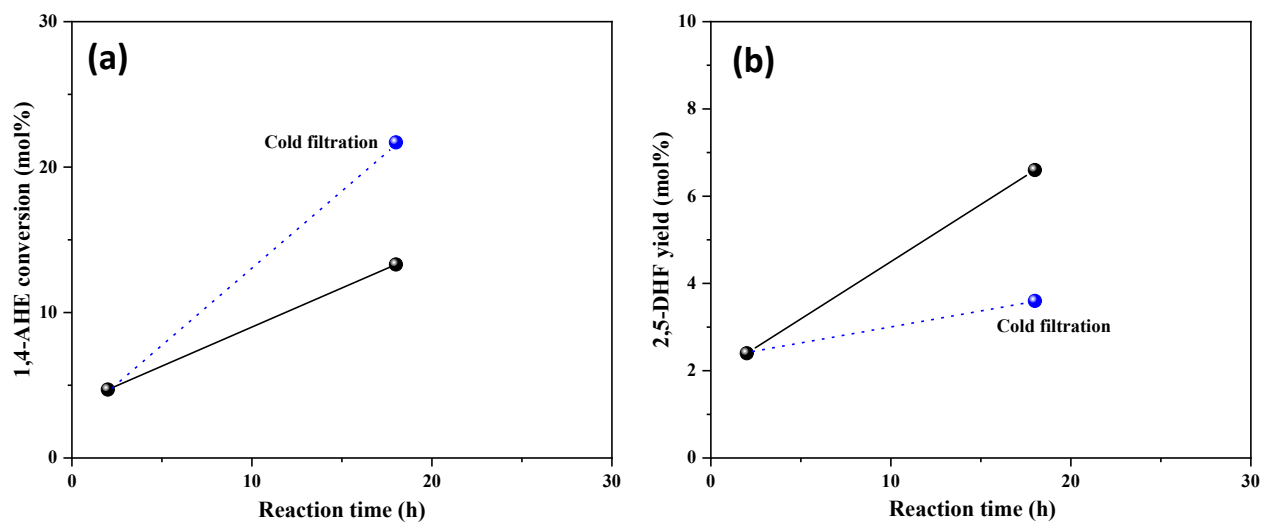

**Fig. S6** Leaching studies of dried 0.5Mo catalyst. (a) Reaction time *versus* 1,4-AHE conversion, and (b) reaction time *versus* 2,5-DHF yield. *Reaction conditions:* 1,4-AHE = 0.6 mmol, 3-Octanol = 6 mmol, Mo = 0.4 mol% w.r.t 1,4-AHE, T = 200°C.

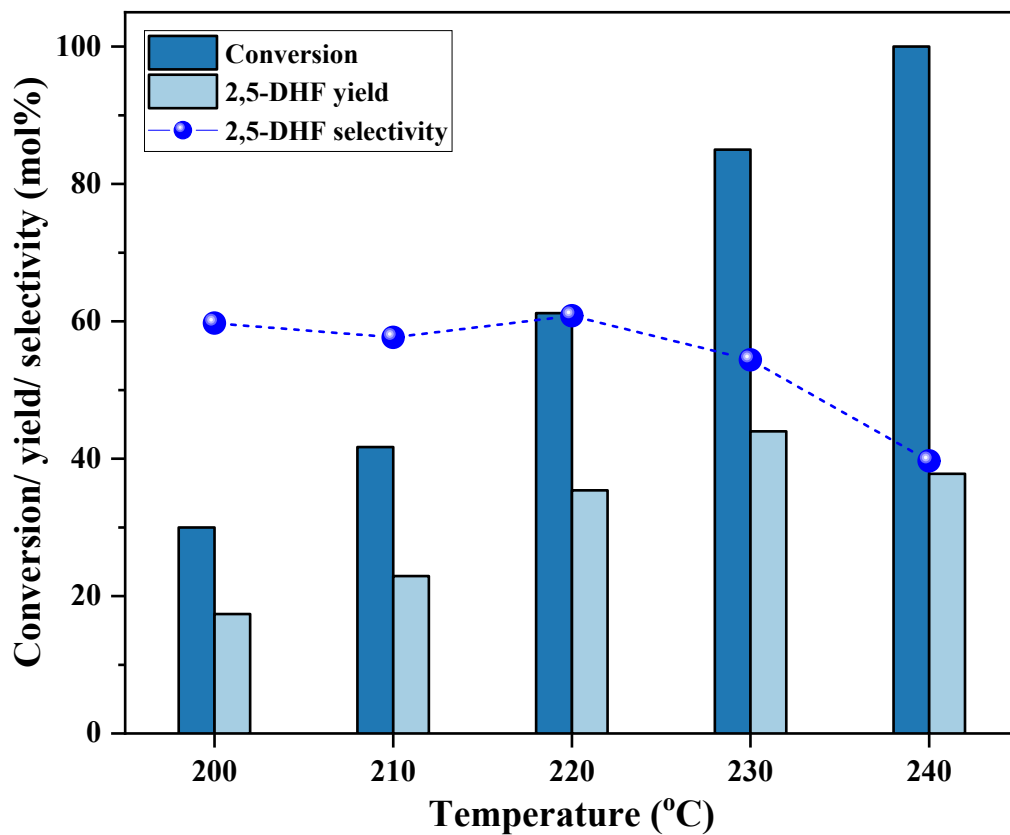

**Fig. S7** Effect of temperature on 1,4-AHE conversion, 2,5-DHF yield, 2,5-DHF selectivity of 0.5Mo catalyst. *Reaction conditions:* 1,4-AHE = 0.6 mmol, 3-Octanol = 6 mmol, Mo = 0.4 mol% w.r.t 1,4-AHE, t = 18 h.



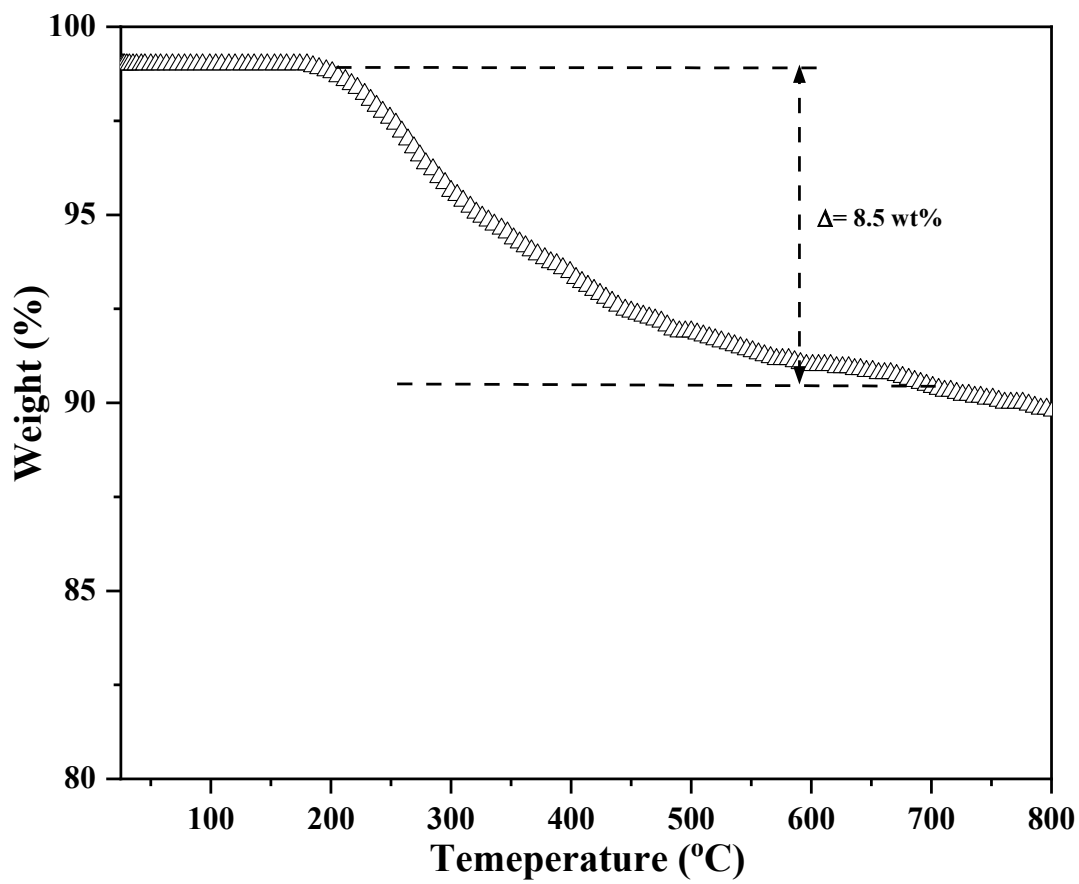

**Fig S8.** TGA analysis of the catalyst after its third recycle experiment.

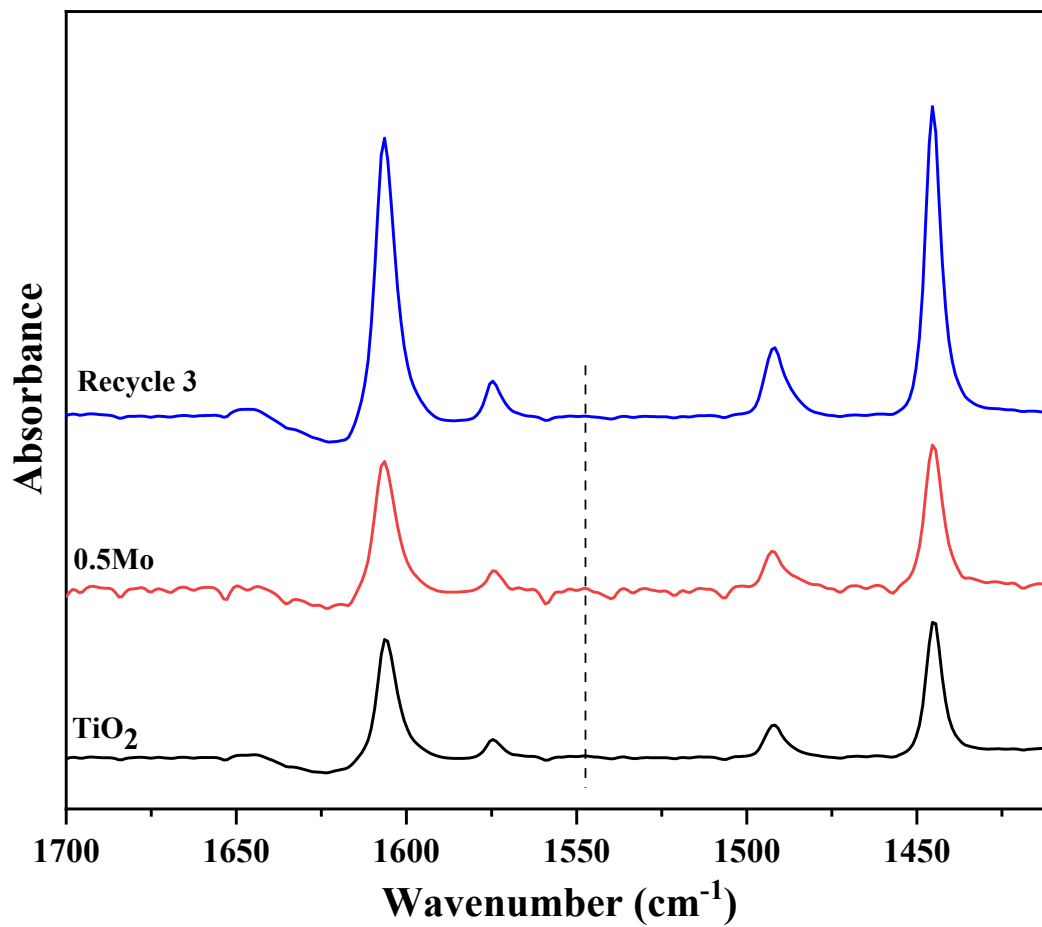

**Fig. S9** Py-FTIR of TiO<sub>2</sub>, 0.5Mo, and calcined recycle 3 catalysts showing the absence of Brønsted acid band at 1545 cm<sup>-1</sup>.

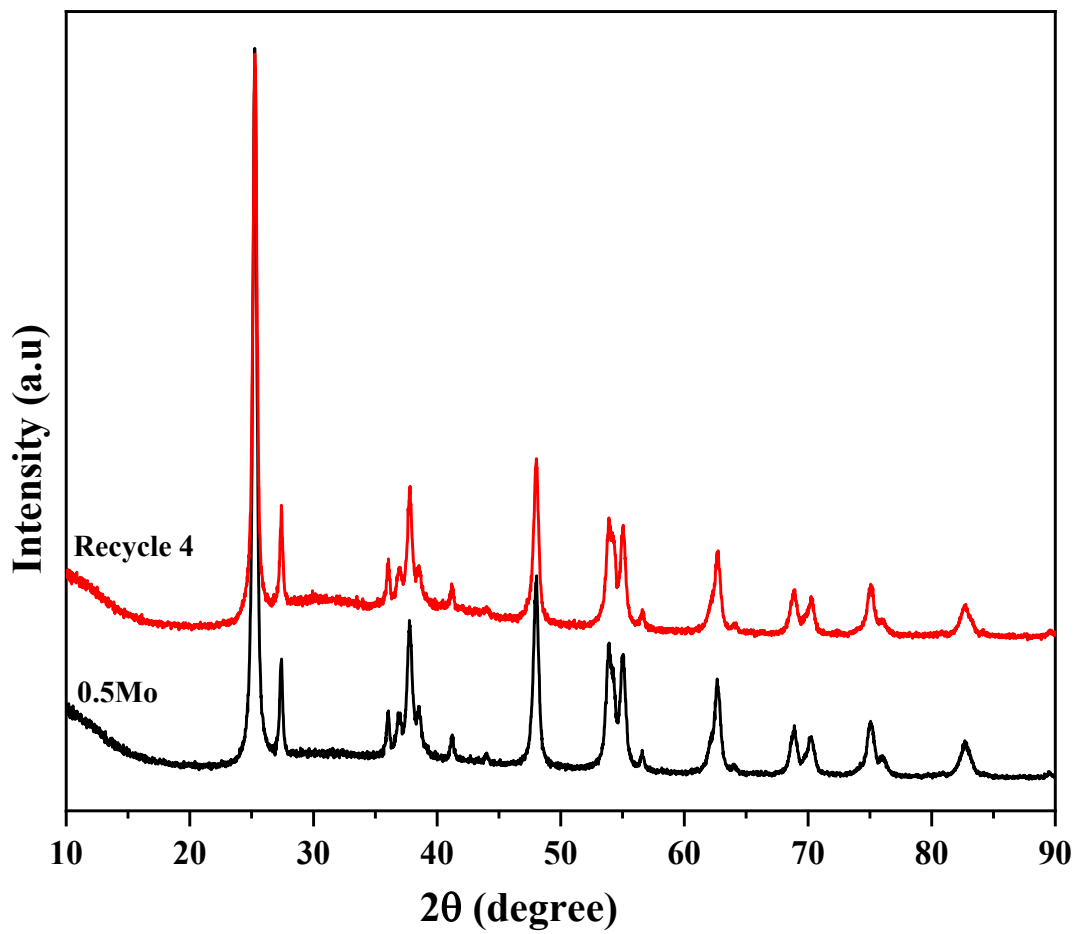

**Fig. S10** XRD 0.5Mo and calcined recycle 4 catalysts.

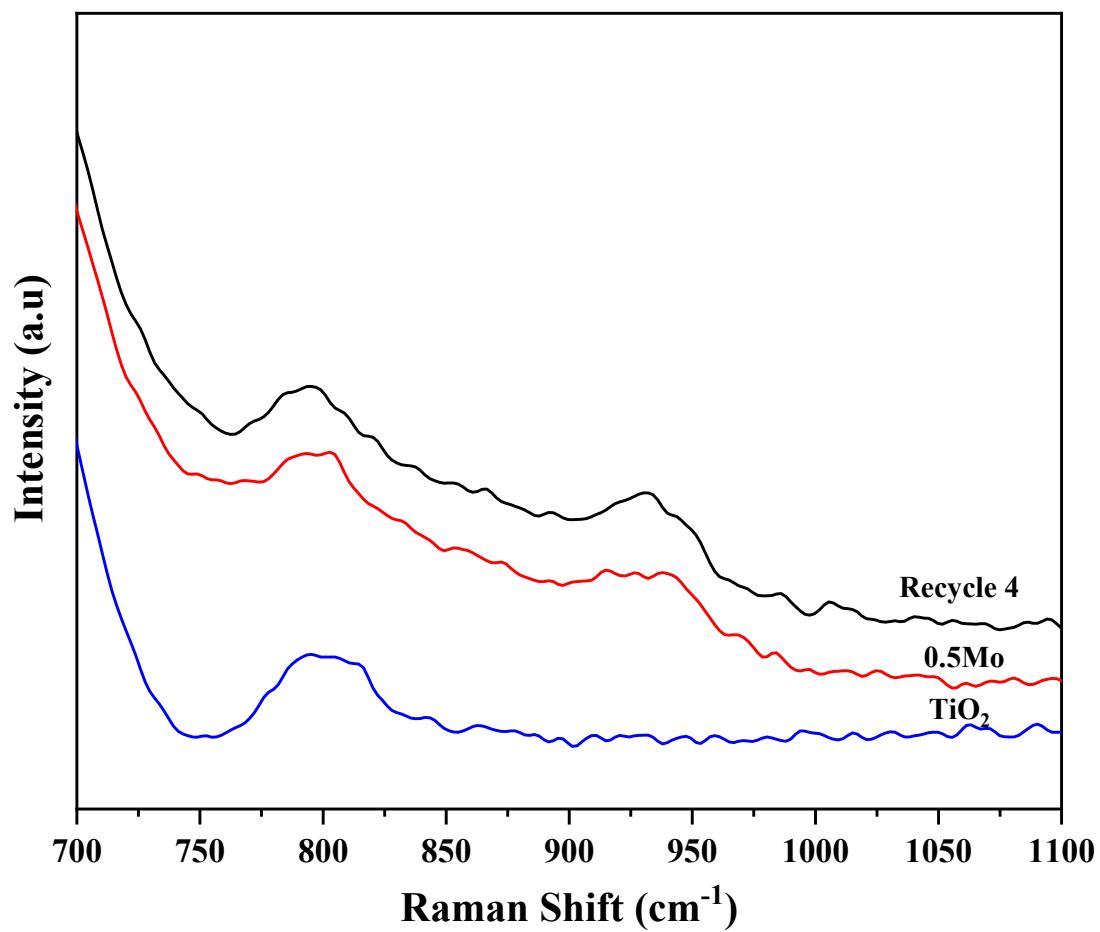

**Fig. S11** Raman spectra of TiO<sub>2</sub>, 0.5Mo, and calcined recycle 4 catalysts.

1. Desired reaction pathway

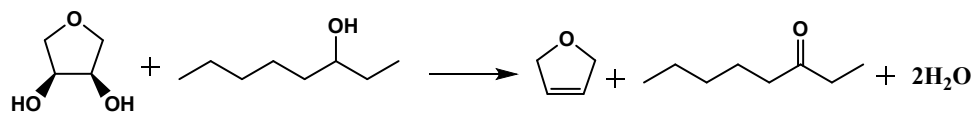

2. Dehydration of 3-octanol to 2-octene and 3-octene

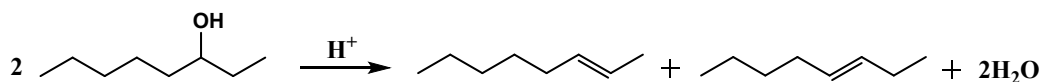

3. Ketal formation from 1,4-AHE and 3-octanone

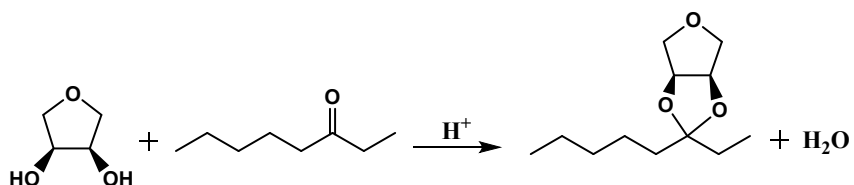

4. 1,4-AHE acting as sacrificial reducing agent

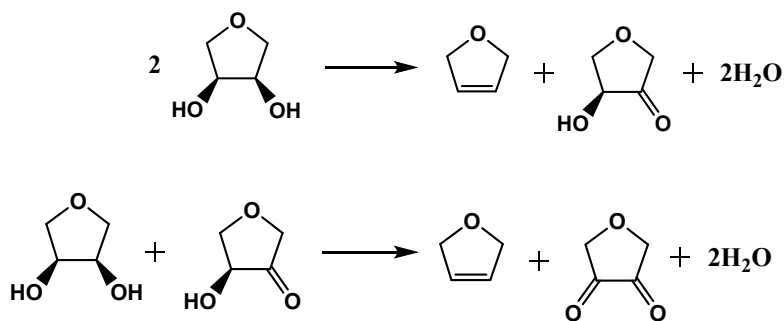

**Scheme S1** Reaction pathways in the DODH of 1,4-AHE in the presence of 3-octanol.
