# Supplementary figures and images for: Influence and stability of the surface density of MoOx on TiO2 in deoxydehydration: structure–activity correlations
Source: Royal Society of Chemistry journal article supplement (doi:10.1039/d2cy01854c), 2023-01-01

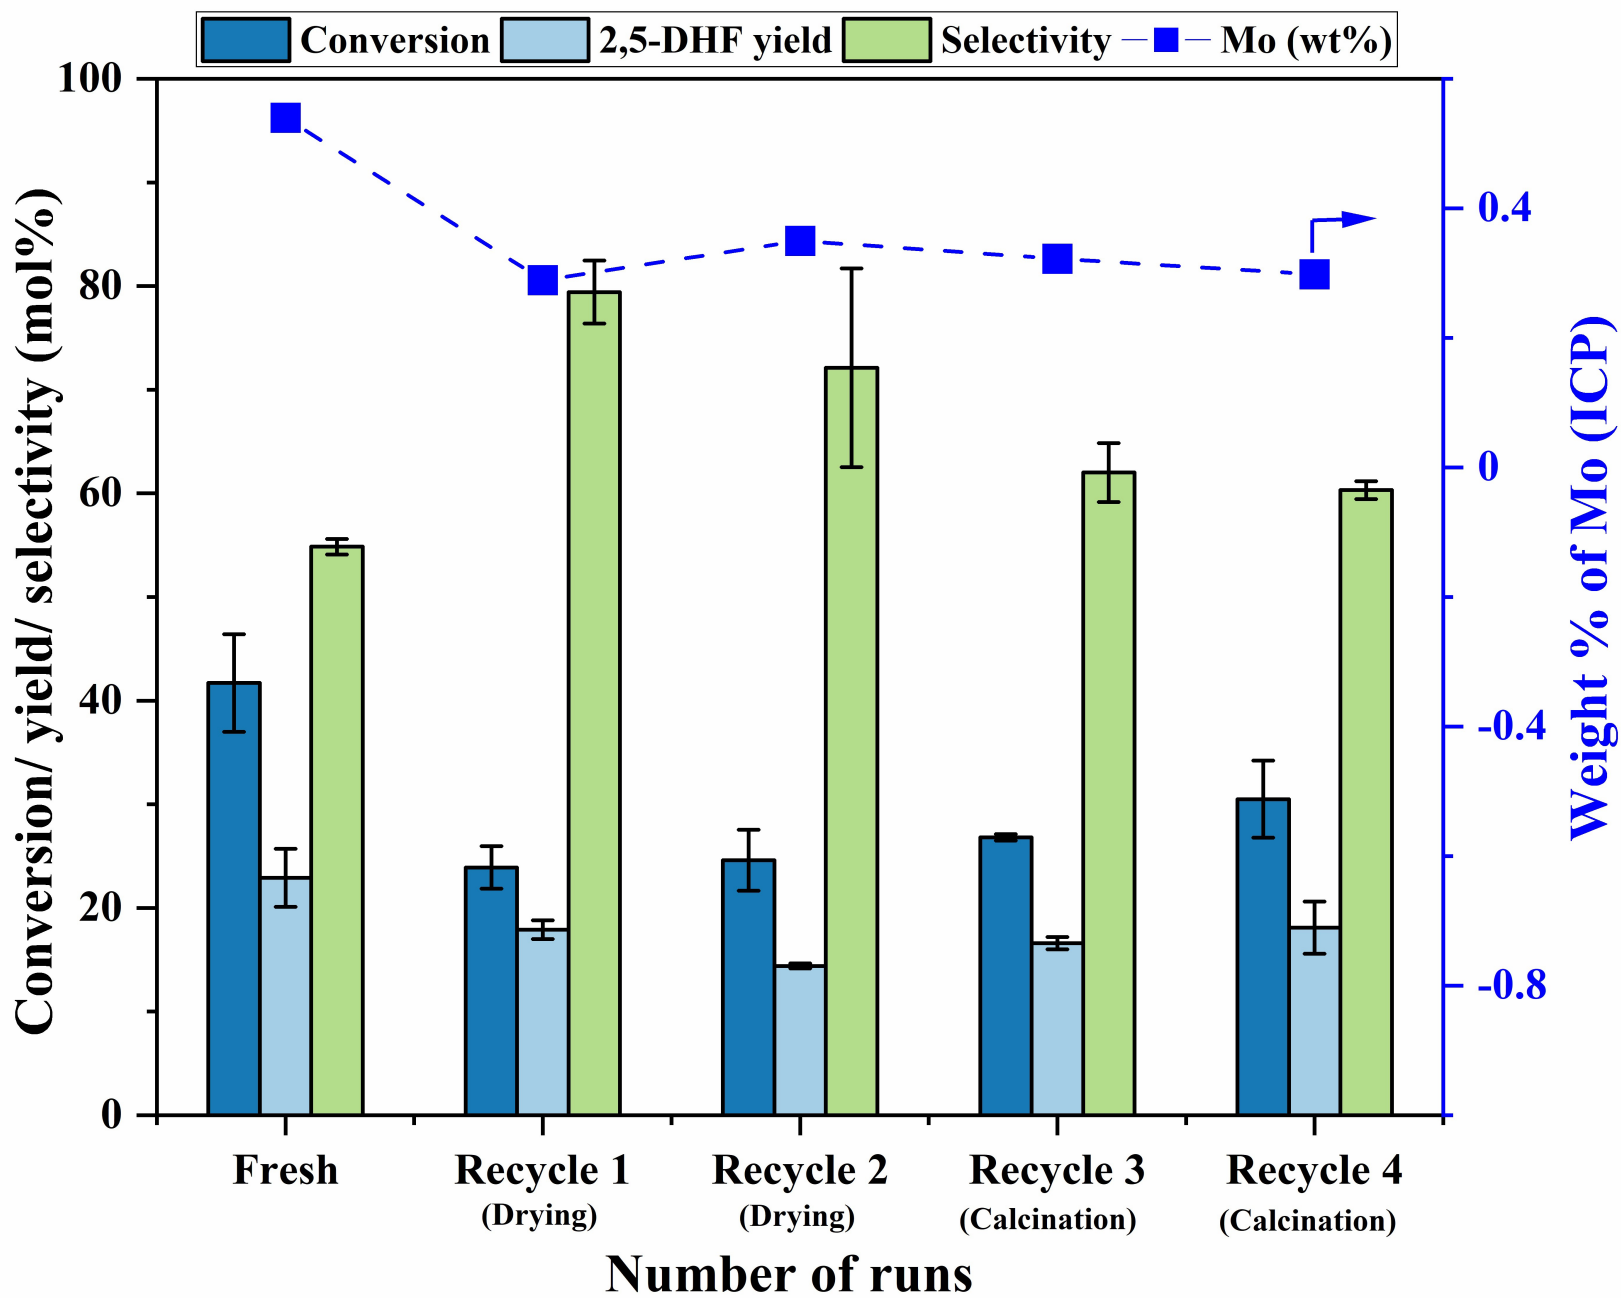

Supplement: d2cy01854c1.pdf [file d2cy01854c1.pdf]
